# Supplementary material for: Sonochemical synthesis of microscale Zn(ii)-MOF with dual Lewis basic sites for fluorescent turn-on detection of Al3+ and methanol with low detection limits
Source: Royal Society of Chemistry journal article supplement (doi:10.1039/d0dt01175d), 2020-01-01
Supplement: d0dt01175d1.pdf [file d0dt01175d1.pdf]

## Supporting Information

### **Sonochemical synthesis of microscale Zn(II)-MOF with dual Lewis basic sites for fluorescent turn-on detection of Al<sup>3+</sup> and methanol with low detection limits**

**Theanchai Wiwasuku,<sup>a</sup> Jintana Othong,<sup>a</sup> Jaurusup Boonmak,<sup>\*a</sup>  
Vuthichai Ervithayasoporn,<sup>b</sup> and Sujitra Youngme<sup>a</sup>**

*<sup>a</sup> Materials Chemistry Research Center, Department of Chemistry and Center of Excellence for Innovation in Chemistry, Faculty of Science, Khon Kaen University, Khon Kaen, 40002, Thailand.*

*<sup>b</sup> Center of Excellence for Innovation in Chemistry, and Center for Inorganic and Materials Chemistry, Department of Chemistry, Faculty of Science, Mahidol University, Rama VI Road, Ratchathewi, Bangkok, 10400, Thailand*

**\* E-mail:** jaurusup@kku.ac.th

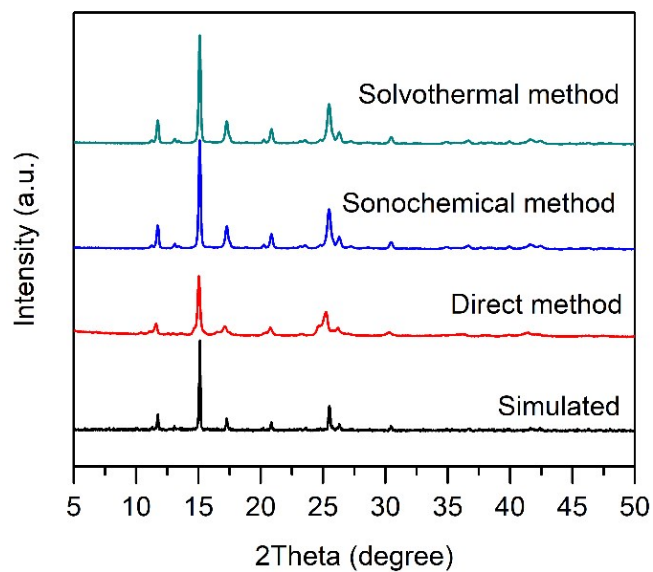

**Fig. S1** PXRD patterns of the simulated, and as-synthesized **Zn-MOF** prepared by direct method, solvothermal method, and sonochemical method using sodium acetate as a modulator.

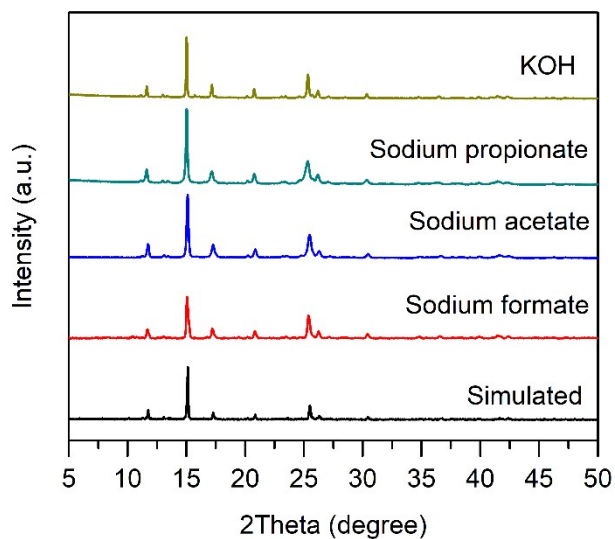

**Fig. S2** PXRD patterns of **Zn-MOF** prepared under sonochemical method with the addition of various modulators.

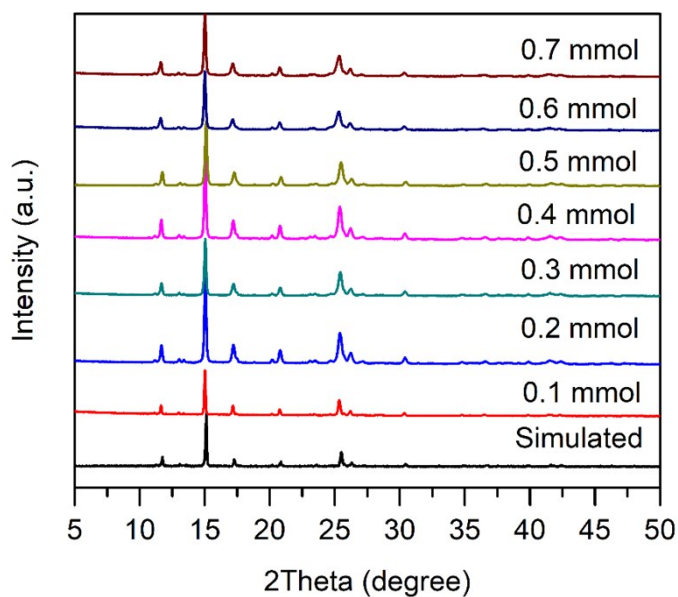

**Fig. S3** PXRD patterns of **Zn-MOF** prepared under sonochemical method with various contents of sodium acetate (a) 0.1 (b) 0.2 (c) 0.3 (d) 0.4 (e) 0.5 (f) 0.6 and (g) 0.7 mmol.

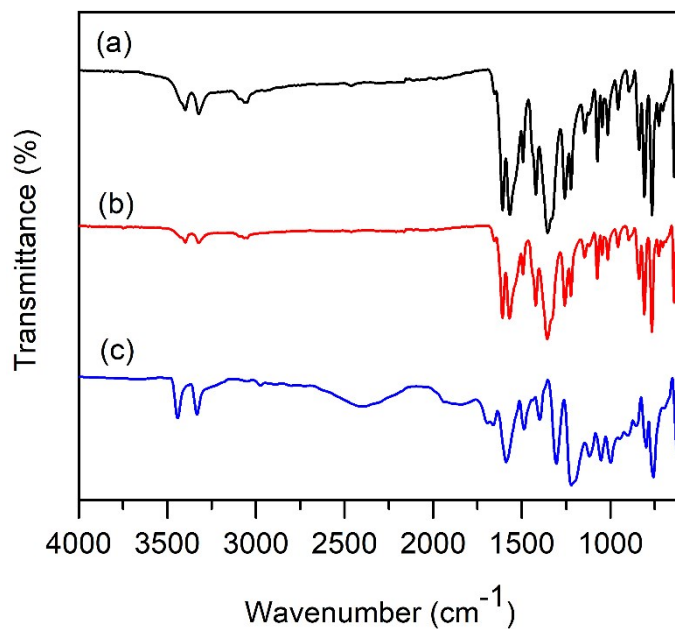

**Fig. S4** FTIR spectra of **Zn-MOF** obtained from solvothermal method in the absence of sodium acetate (a) sonochemical method in the presence of sodium acetate (b) and acetic acid (c).

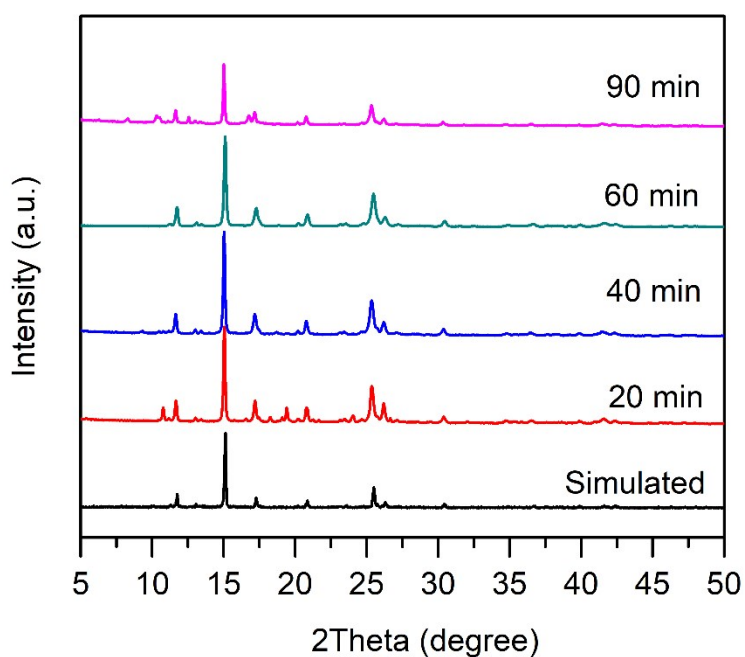

**Fig. S5** PXRD patterns of **Zn-MOF** prepared under sonochemical method with various sonication times of (a) 20 (b) 40 (c) 60 and (d) 90 min.

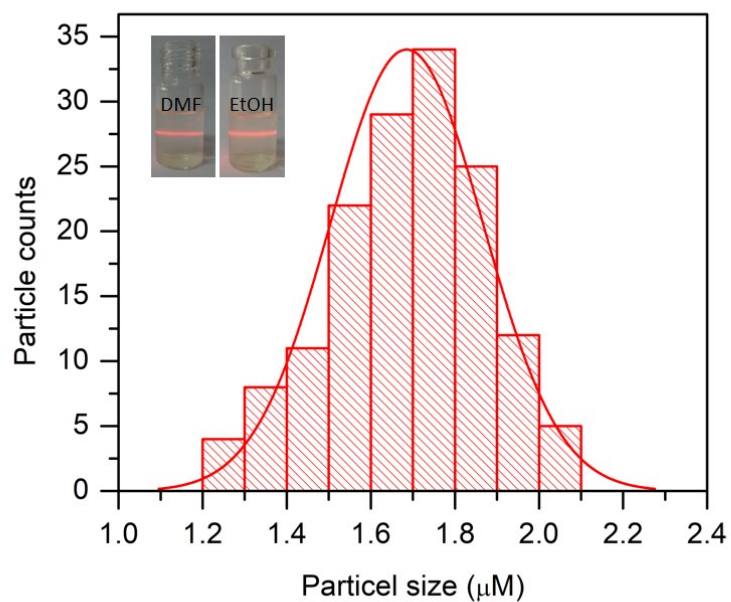

**Fig. S6** The particle size distribution of **Zn-MOF** particles from the optimized condition (inset is Tyndall effect of a colloidal suspension of **Zn-MOF** in DMF and ethanol).

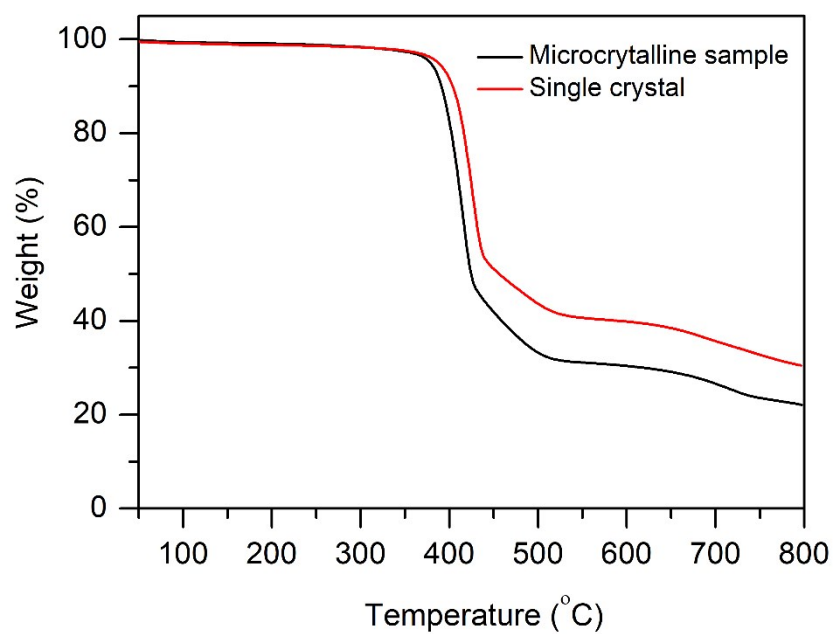

**Fig. S7** TGA of microcrystalline sample and single crystal of **Zn-MOF**.

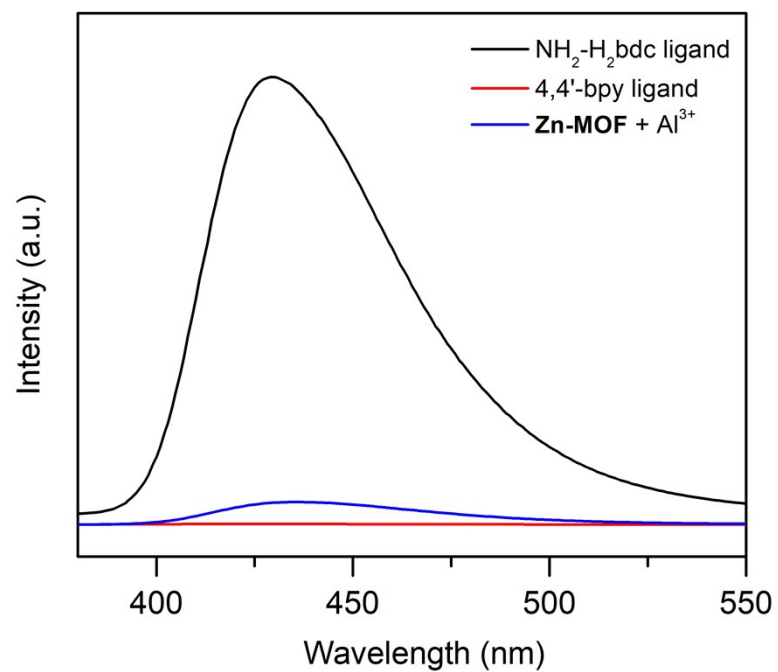

**Fig. S8** Fluorescent spectra of free NH<sub>2</sub>-H<sub>2</sub>bdc, 4,4'-bpy and **Zn-MOF** treated with Al<sup>3+</sup> in DMF.

**Table S1.** Calculation of LOD for Al<sup>3+</sup>

| Blank                                    | Fluorescent intensity |
|------------------------------------------|-----------------------|
| 1                                        | 1084.871              |
| 2                                        | 1106.897              |
| 3                                        | 1055.158              |
| 4                                        | 1127.844              |
| 5                                        | 1083.121              |
| 6                                        | 1092.382              |
| 7                                        | 1110.127              |
| 8                                        | 1076.111              |
| 9                                        | 1121.212              |
| 10                                       | 1061.028              |
| Standard deviation ( $\sigma$ )          | 24.4662               |
| Slope (S)                                | 2452.37               |
| Limit of detection (LOD) ( $3\sigma/S$ ) | 30.00 nM              |

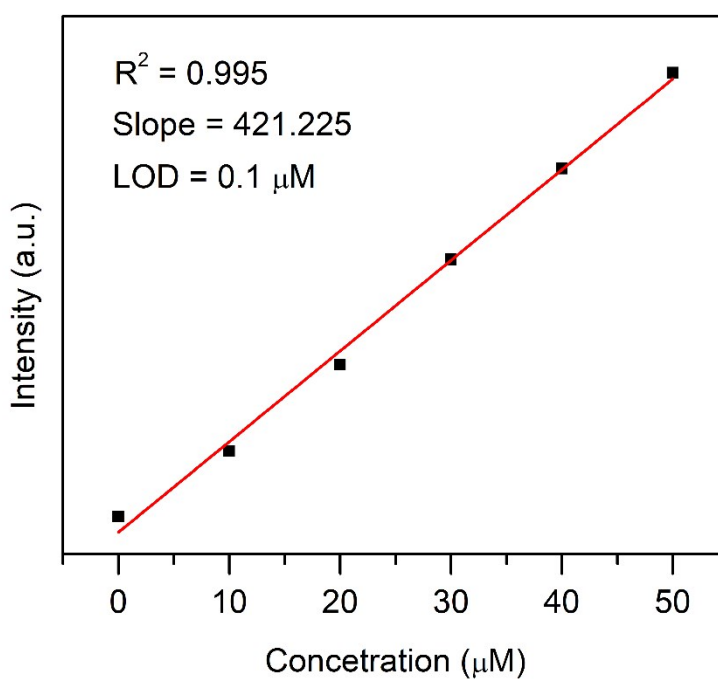**Fig. S9** The linear enhancement response of bulk crystals **Zn-MOF** toward Al<sup>3+</sup>.

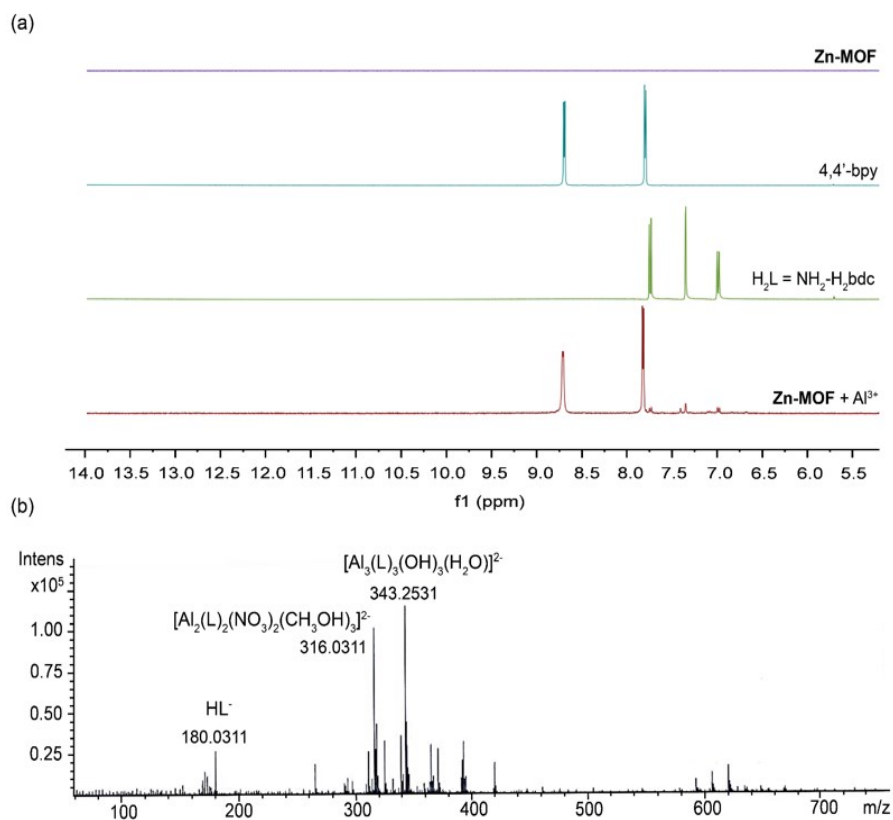

**Fig. S10** (a)  $^1\text{H}$  NMR spectra of **Zn-MOF**, 4,4'-bpy,  $\text{NH}_2\text{-H}_2\text{bdc}$ , and **Zn-MOF** in the presence of  $\text{Al}^{3+}$ . (b) ESI-MS spectra of **Zn-MOF** in the presence of  $\text{Al}^{3+}$ .

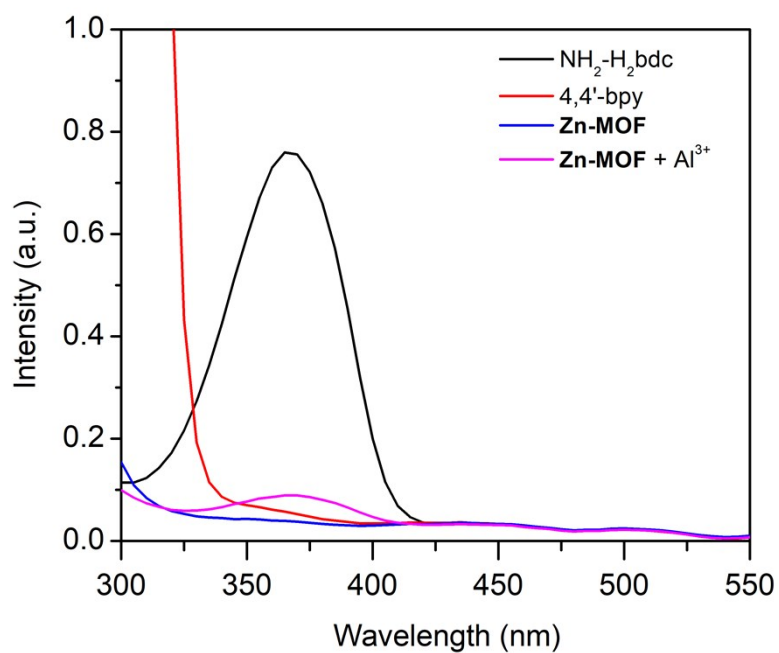

**Fig. S11** UV-vis spectra of free  $\text{NH}_2\text{-H}_2\text{bdc}$ , 4,4'-bpy and **Zn-MOF** with and without  $\text{Al}^{3+}$  in DMF.



| Blank                                    | Fluorescent intensity |
|------------------------------------------|-----------------------|
| 1                                        | 2361.525              |
| 2                                        | 2321.925              |
| 3                                        | 2312.565              |
| 4                                        | 2371.134              |
| 5                                        | 2265.447              |
| 6                                        | 2391.375              |
| 7                                        | 2333.263              |
| 8                                        | 2456.372              |
| 9                                        | 2372.212              |
| 10                                       | 2299.29               |
| Standard deviation ( $\sigma$ )          | 54.0246               |
| Slope (S)                                | 2314.943              |
| Limit of detection (LOD) ( $3\sigma/S$ ) | 0.07 % (V/V)          |

**Table S2** Calculation of LOD for methanol

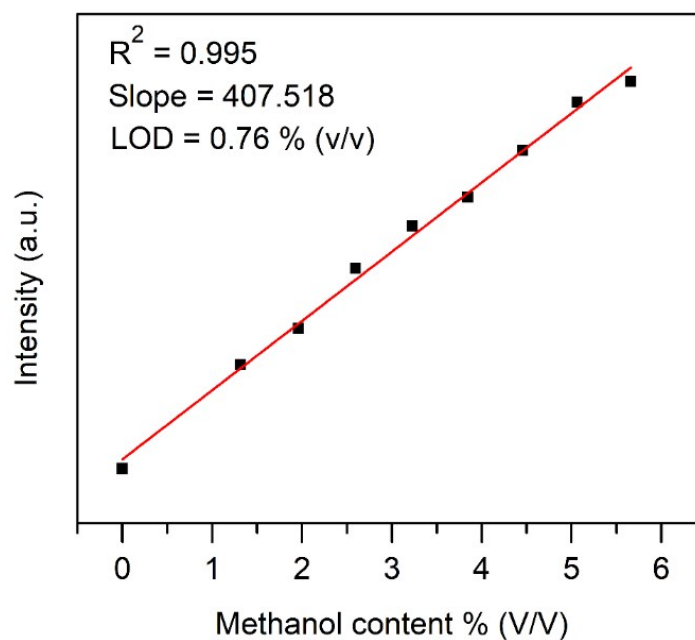

**Fig. S12** The linear enhancement response of bulk phase **Zn-MOF** toward methanol.

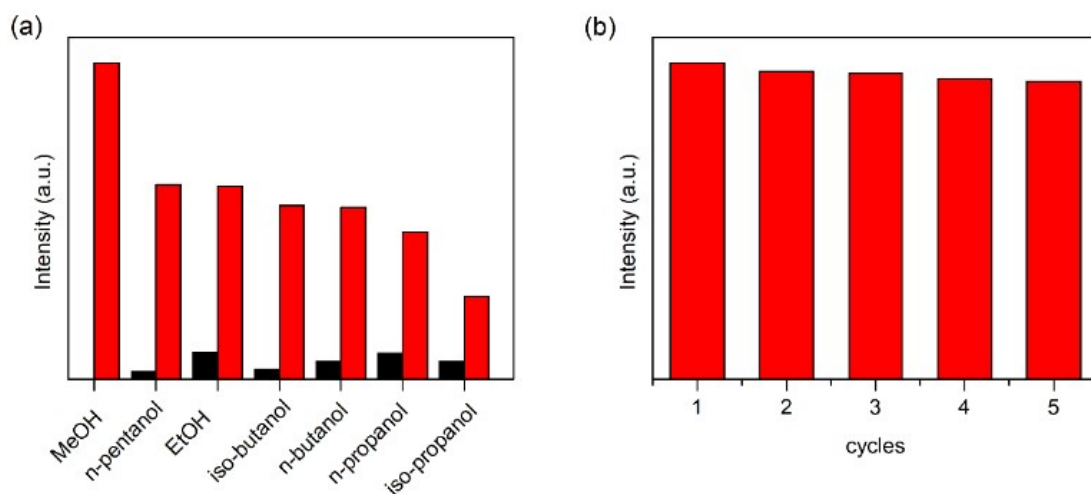

**Fig. S13** (a) Fluorescent responses of **Zn-MOF** toward various alcohols. The black bar denotes the fluorescent intensities of **Zn-MOF** in various alcohols, and red bar denotes the fluorescent intensities of **Zn-MOF** upon addition of mixture methanol and other alcohols with the ratio of 1:1 (b) Recycle test for methanol sensing by **Zn-MOF**.

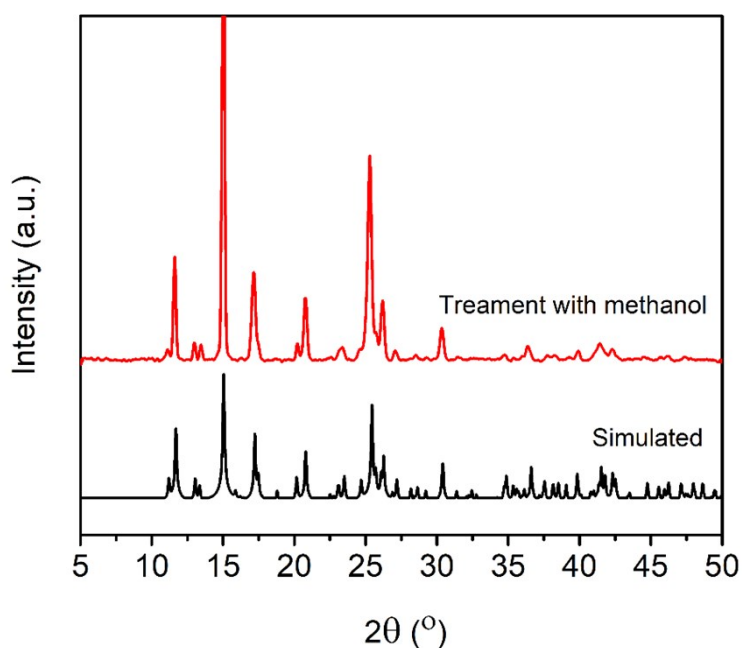

**Fig. S14** PXRD patterns of the as-synthesized **Zn-MOF** and **Zn-MOF** immersed in pure methanol for 1 day.

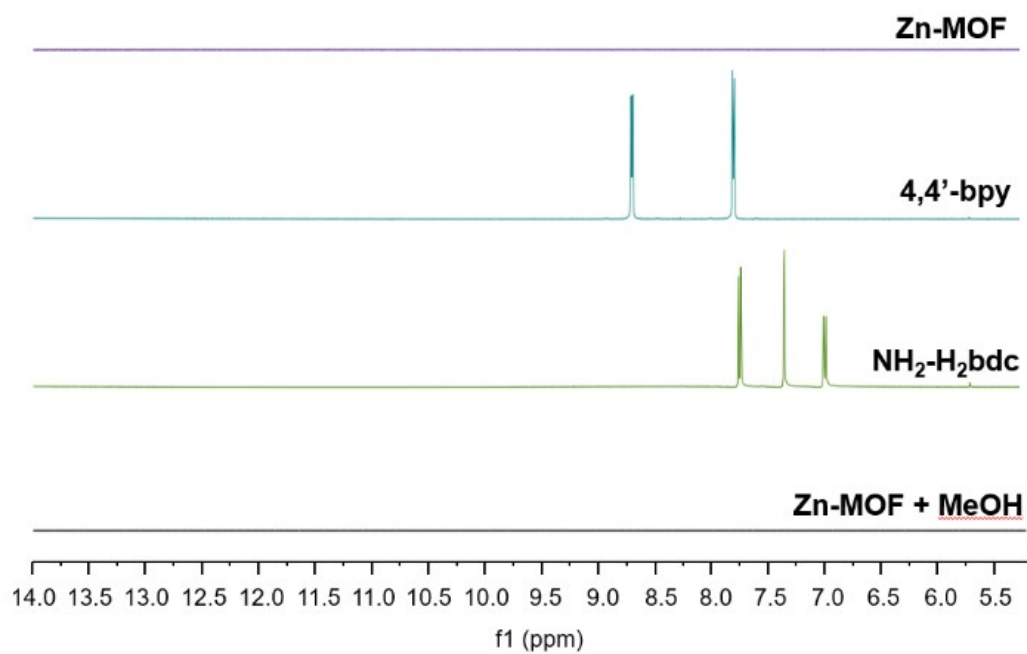

**Fig. S15** <sup>1</sup>H NMR spectra of **Zn-MOF**, 4,4'-bpy, NH<sub>2</sub>-H<sub>2</sub>bdc, and **Zn-MOF** in the presence of MeOH.
